# Supplementary material for: Intermolecular forces in intercluster compounds consisting of gold clusters and fullerides and in a series of model compounds C60·2(PR3)AuCl
Source: Royal Society of Chemistry journal article supplement (doi:10.1039/b800093j), 2008-01-01
Supplement: b800093j.pdf [file b800093j.pdf]

## SUPPORTING INFORMATION

### Intermolecular forces in intercluster compounds consisting of gold clusters and fullerides and in a series of model compounds $C_{60} \cdot 2(PR_3)AuCl$

Martin Schulz-Dobrick and Martin Jansen\*

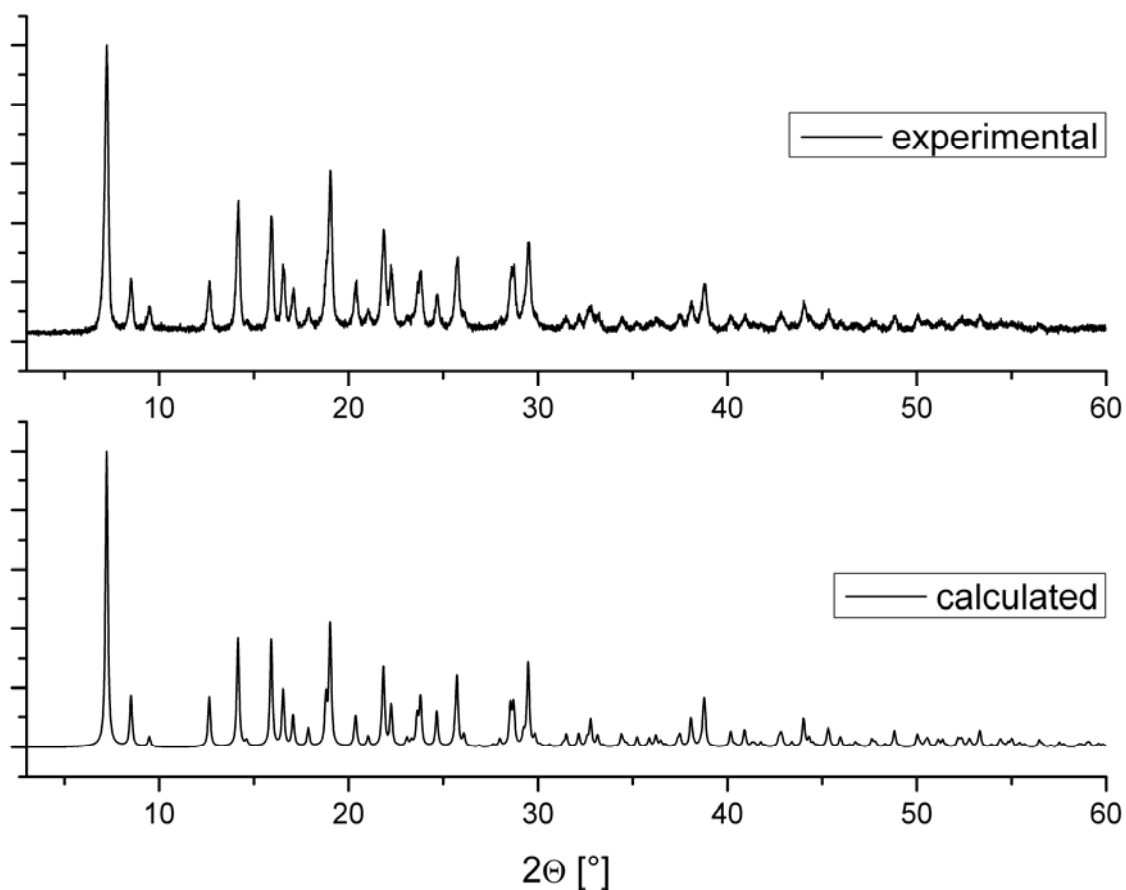

**Figure S1** Experimental and calculated powder x-ray diffractograms of **4**.

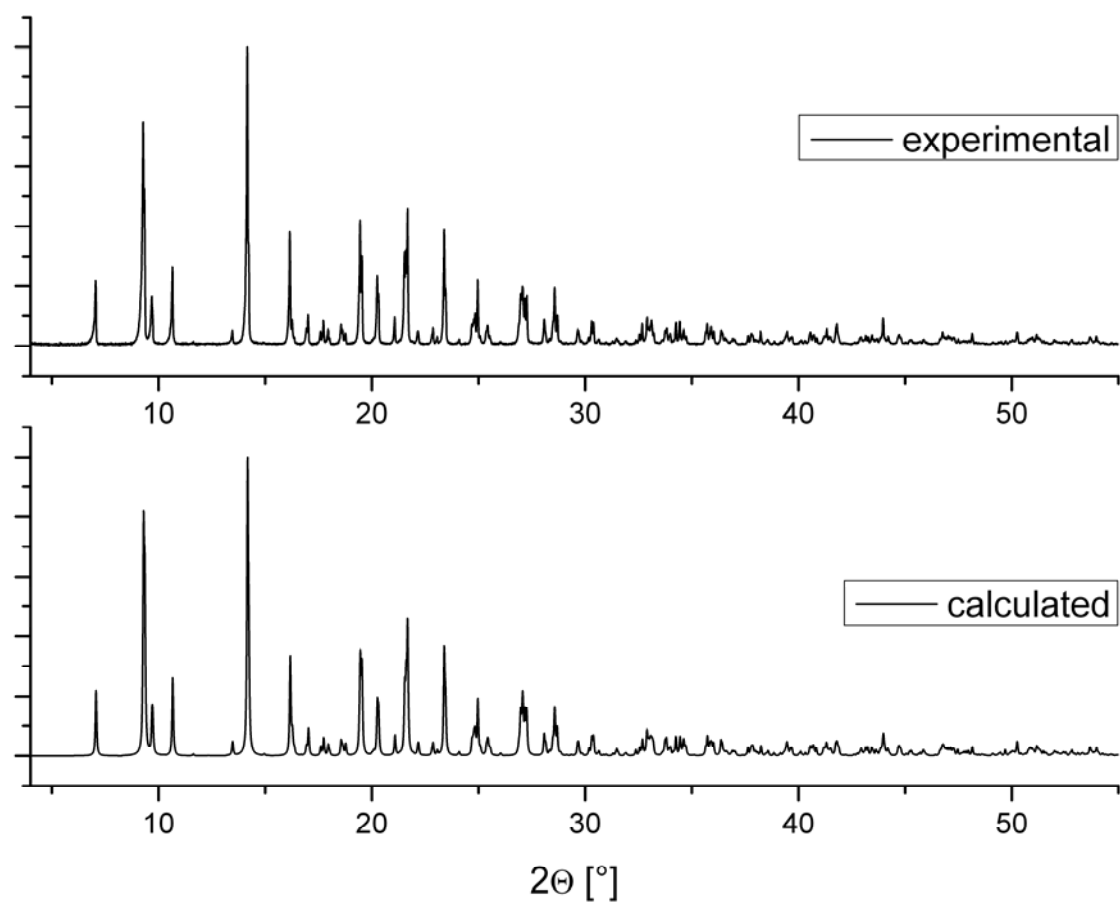

**Figure S2** Experimental and calculated powder x-ray diffractograms of **5**.
